# Supplementary material for: V–VO2core–shell structure for potential thermal switching
Source: Royal Society of Chemistry journal article supplement (doi:10.1039/c7ra05766k), 2017-01-01
Supplement: c7ra05766k1.pdf [file c7ra05766k1.pdf]

## Supplemental Information for

# V-VO<sub>2</sub> Core-shell Structure for Potential Thermal Switching

Keshab Dahal<sup>a</sup>, Qian Zhang<sup>a,b</sup>, Yumei Wang<sup>a,c</sup>, Ishwar Kumar Mishra<sup>a</sup> and Zhifeng Ren<sup>a\*</sup>

<sup>a</sup>Department of Physics and TcSUH, University of Houston, Houston, Texas 77204, USA

<sup>b</sup>Department of Materials Science and Engineering, Harbin Institute of Technology (Shenzhen), Shenzhen, Guangdong 518055, P. R. China

<sup>c</sup>Beijing National Laboratory for Condensed Matter Physics, Institute of Physics, Chinese Academy of Sciences, Beijing 100190, P. R. China

\*To whom correspondence should be addressed: [zren@uh.edu](mailto:zren@uh.edu)

This file includes:

Fig. S1, Fig. S2 and Fig. S3.

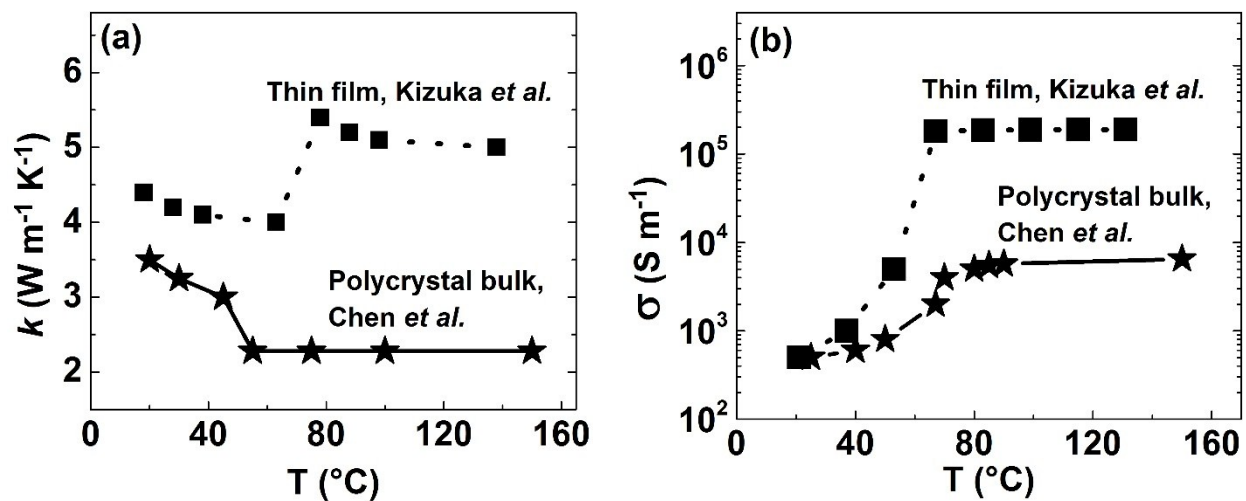

Fig. S1: Reported (a) thermal conductivity, and (b) electrical conductivity of different VO<sub>2</sub>

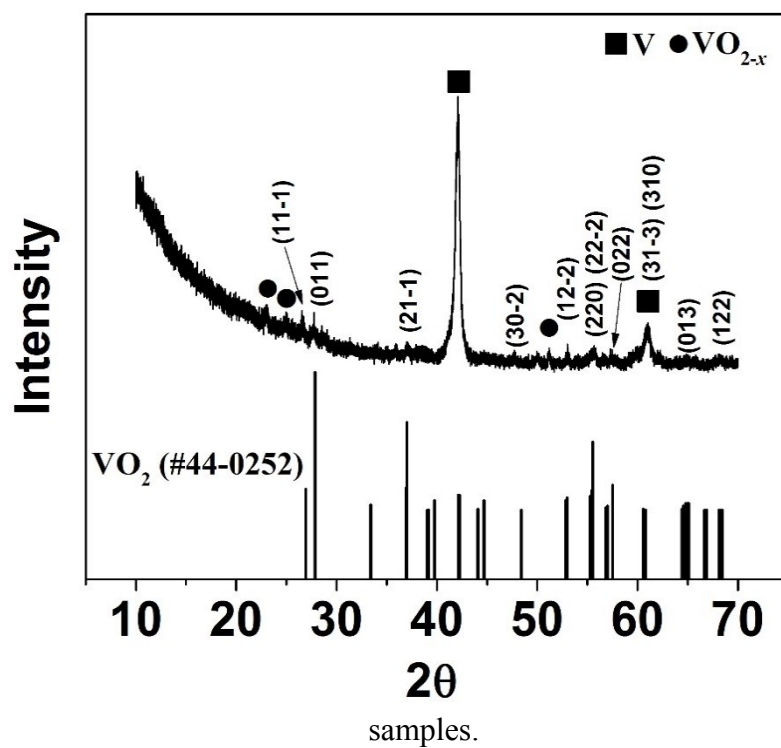

Fig. S2: XRD pattern of polished surface of V bar sample annealed at 350 °C + 380 °C + 425 °C for 7+7+7 hour.

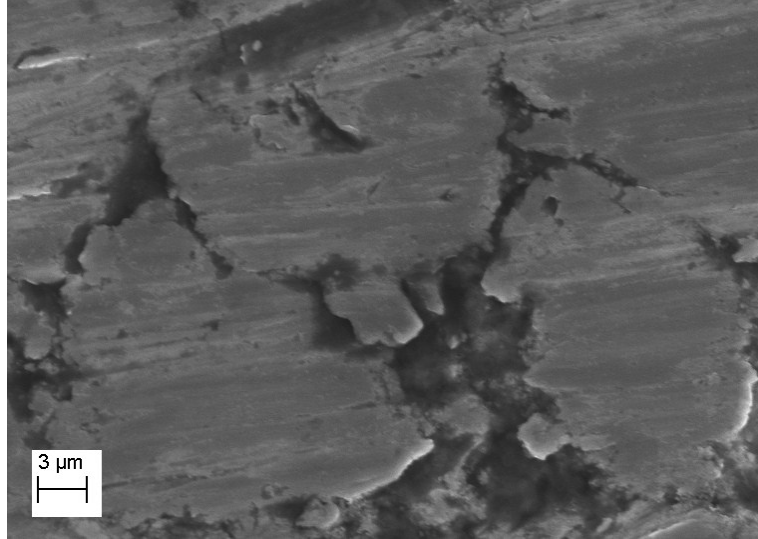

**Fig. S3:** SEM image of V-VO<sub>2</sub> sample annealed at 350 °C + 380 °C + 425 °C for 7+7+7 hour, showing the isolation of V particle separated by VO<sub>2</sub>.
